WITHDRAWN ARTICLE

**WITHDRAWN: Long intergenic non-coding RNA LINC00662 contributes to malignant growth of colorectal cancer cells by upregulating c-myc via sponging microRNA-145**

Zhifeng Yao, Danghui Xu, Zhanfeng Li, Jianxin Yao, Zhiyao Pan, Jinfei Chen

*Bioscience Reports* (2020) BSR20200011; **DOI:** 10.1042/BSR20200011

The Accepted Manuscript version of this article (published on 29 May 2020) was withdrawn on 29 July 2020 at the request of the authors due to concerns over data validity.
